# Supplementary material for: Single-atom metal–N4site molecular electrocatalysts for ambient nitrogen reduction
Source: Royal Society of Chemistry journal article supplement (doi:10.1039/d1cy00022e), 2021-01-01
Supplement: d1cy00022e1.pdf [file d1cy00022e1.pdf]

## Electronic Supplementary Information

### **Single-atom metal-N<sub>4</sub> sites molecular electrocatalysts for ambient nitrogen reduction**

Sai Sun,<sup>‡</sup> Xiaoxuan Yang,<sup>‡</sup> Siqi Li,<sup>‡</sup> Xinyu Chen, Ke Li, Jiaqi Lv, Wenwen Wang, Dongming Cheng,  
Yong-Hui Wang and Hong-Ying Zang\*

Key Laboratory of Polyoxometalate Science of the Ministry of Education, Faculty of Chemistry,  
Northeast Normal University, Changchun 130024, China.

E mail: [zanghy100@nenu.edu.cn](mailto:zanghy100@nenu.edu.cn).

<sup>‡</sup> These authors contributed equally to this work.

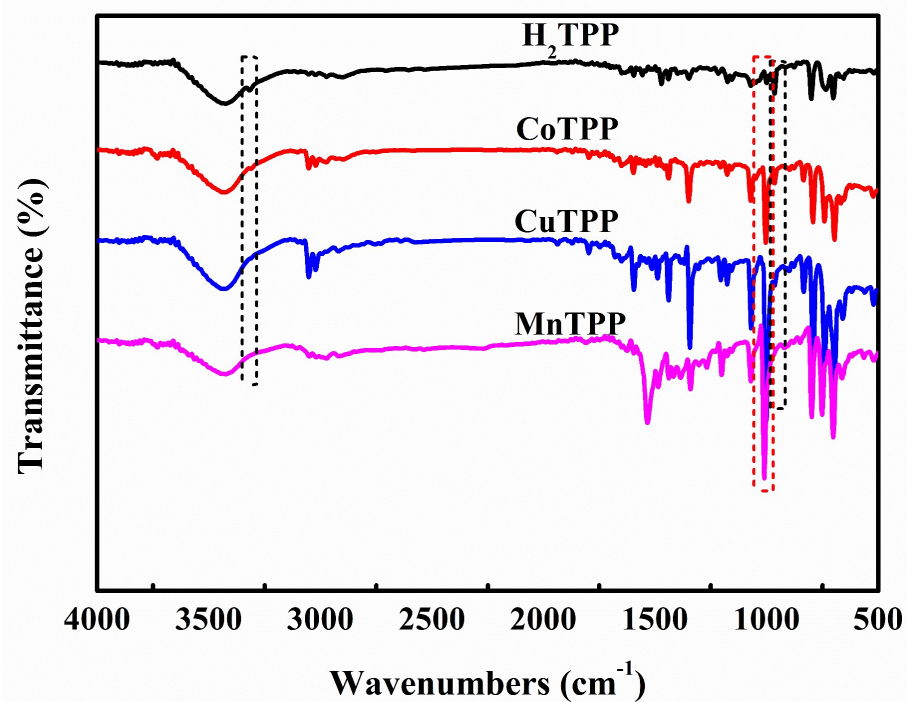

Fig. S1. FT-IR spectra of H<sub>2</sub>TPP, CoTPP, CuTPP and MnTPP, respectively.

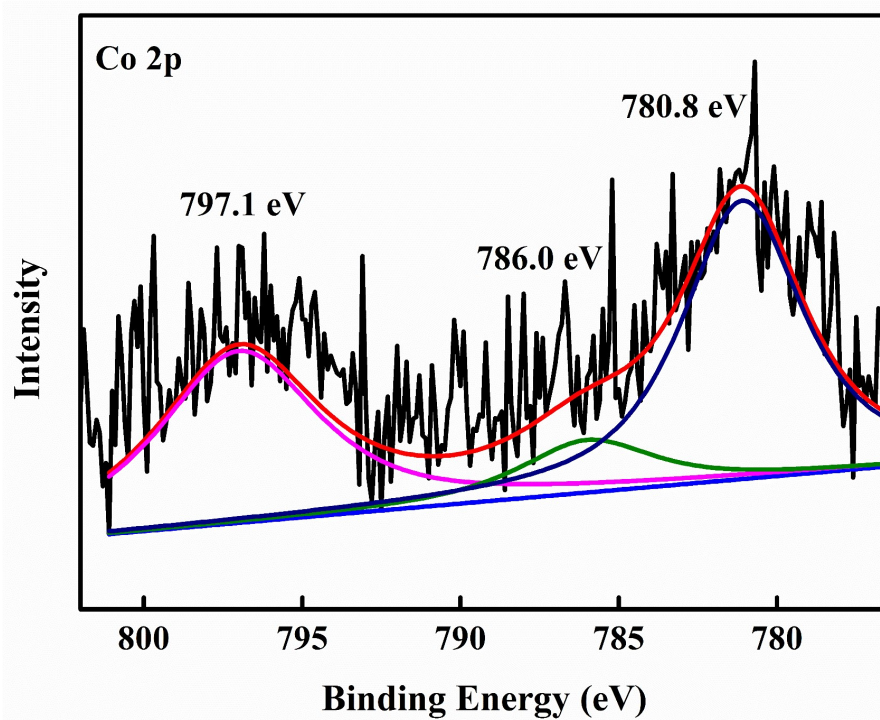

Fig. S2 XPS of CoTPP in the Co 2p regions.

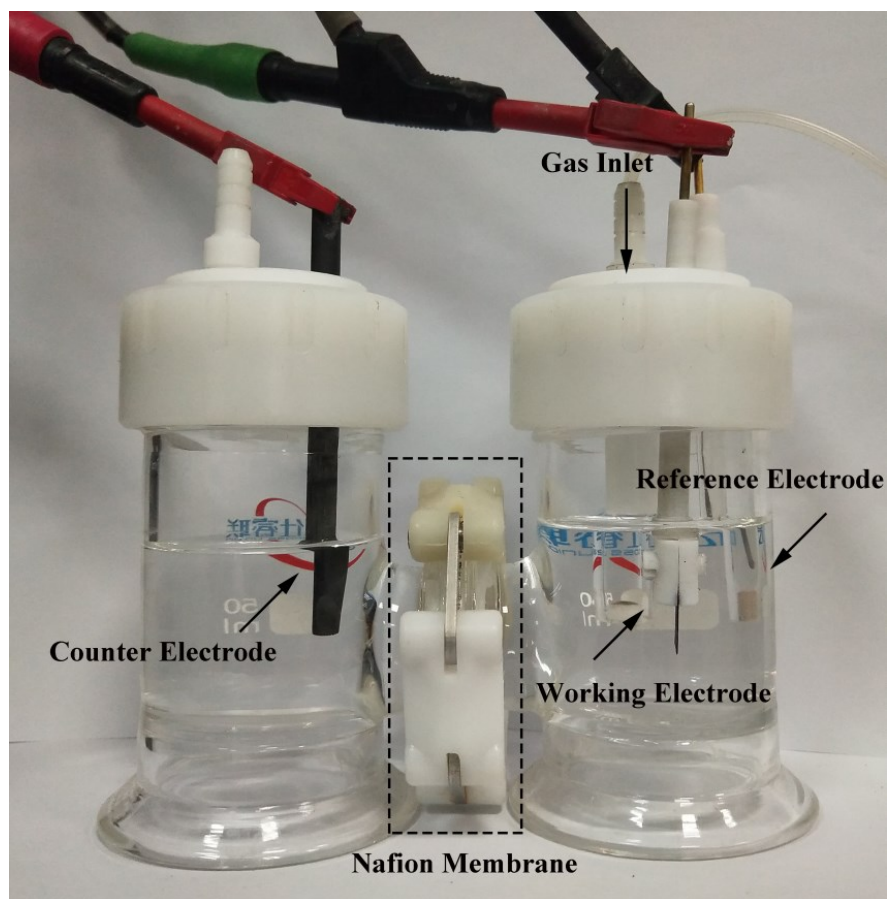

Fig. S3. The H-shape electrolytic cell for nitrogen reduction reaction.

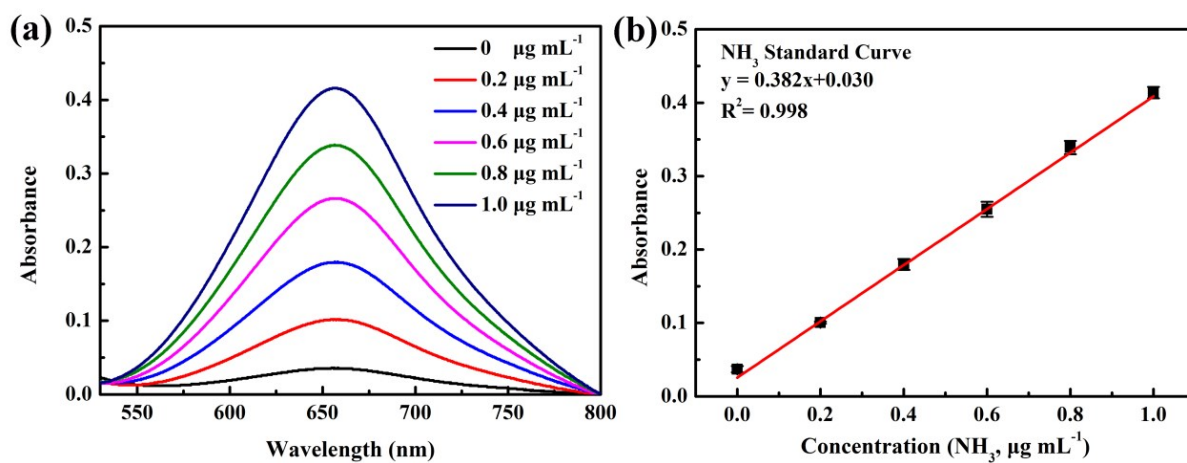

Fig. S4. Calibration curve in 0.1 M HCl using  $\text{NH}_4\text{Cl}$  solution of known concentration as standards for three times. (a) UV-Vis absorption spectra of various  $\text{NH}_4^+$  concentrations after incubated for 2 h at room temperature. (b) Calibration curve used for estimation  $\text{NH}_3$  concentration.

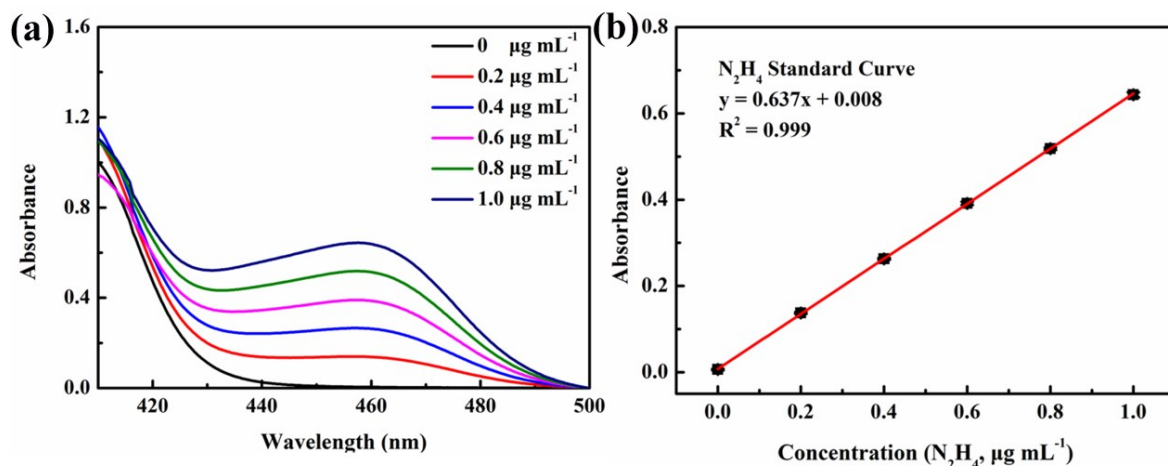

Fig. S5. Calibration curve in 0.1 M HCl using hydrazine solution of known concentration as standards for three times. (a) UV-Vis absorption spectra of various  $\text{N}_2\text{H}_4$  concentrations after incubated for 20 min at room temperature. (b) Calibration curve used for estimation of  $\text{N}_2\text{H}_4$  concentrations.

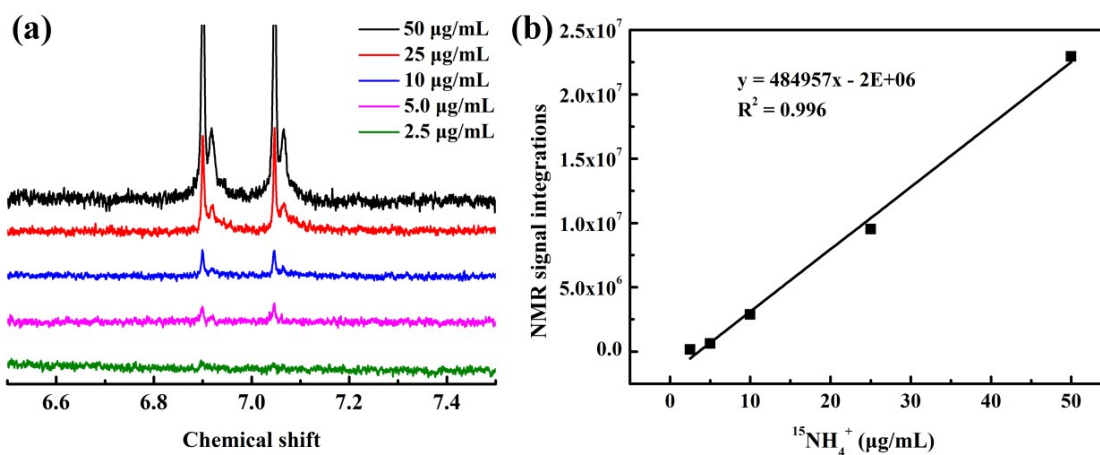

Fig. S6. (a)  $^1\text{H}$  NMR spectra for standard  $^{15}\text{NH}_4^+$  solution with concentrations of 2.5, 5.0, 10, 25 and 50  $\mu\text{g mL}^{-1}$  in 0.1 M HCl. (b) Calibration curve of  $^1\text{H}$  NMR signal for standard  $\text{NH}_4^+$  solutions with various concentrations of 2.5, 5.0, 10, 25 and 50  $\mu\text{g mL}^{-1}$  in 0.1 M HCl. The black line is the linear fitting of NMR signal integration value with a  $R^2$  value of 0.996.

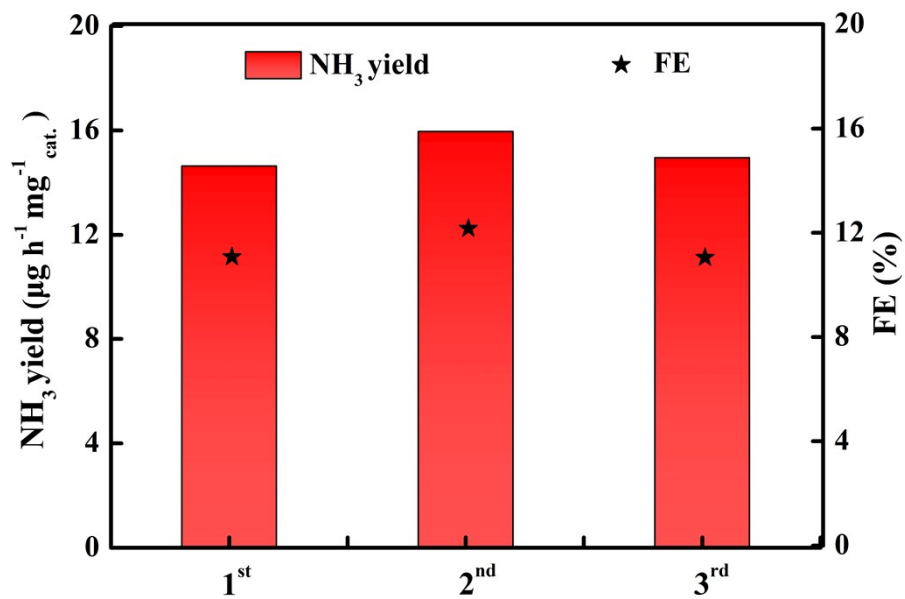

Fig. S7. NH<sub>3</sub> yields and FEs of CoTPP measured for three times at -0.3 V vs. RHE in 0.1 M HCl.

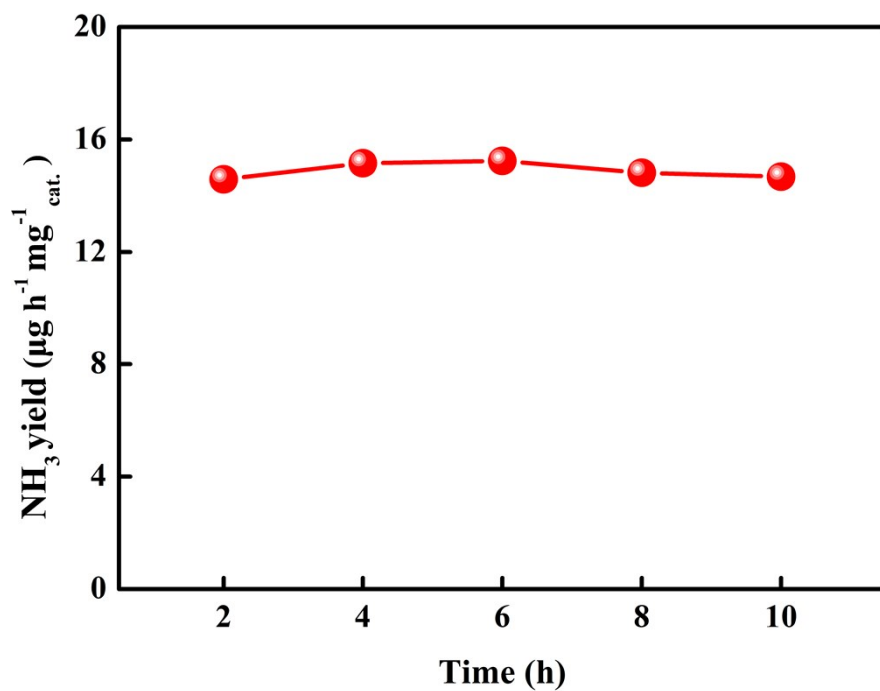

Fig. S8. The ammonia yields of CoTPP electrocatalyst during 10 h electrolysis.

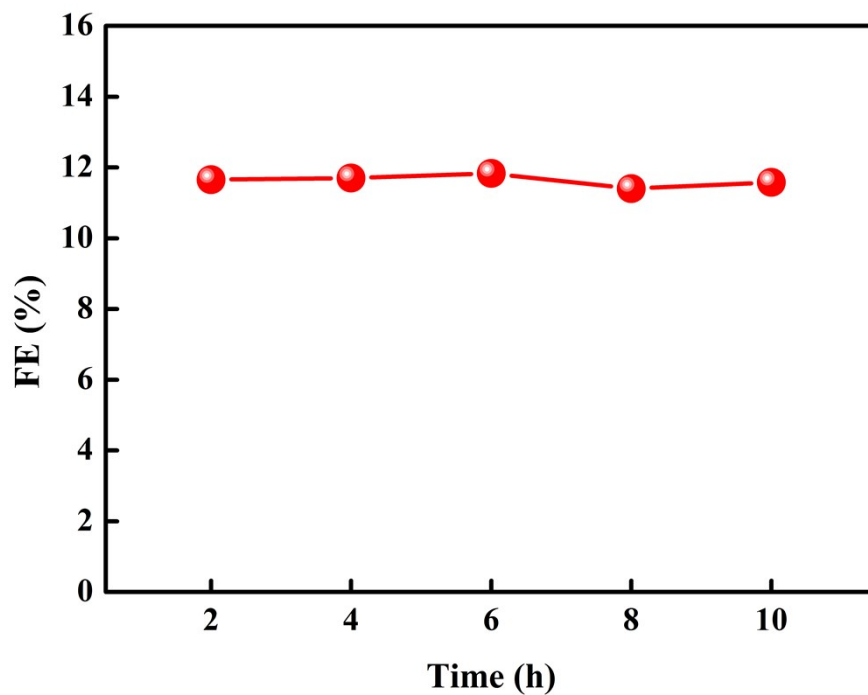

Fig. S9. The FEs of CoTPP electrocatalyst during 10 h electrolysis.

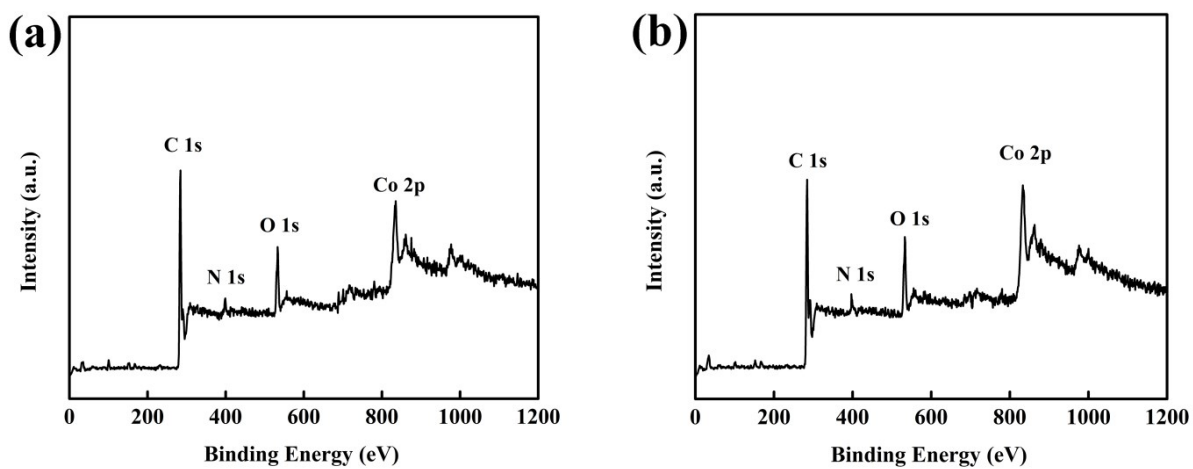

Fig. S10. XPS spectra for CoTPP before (a) and after (b) 2 h electrolysis.

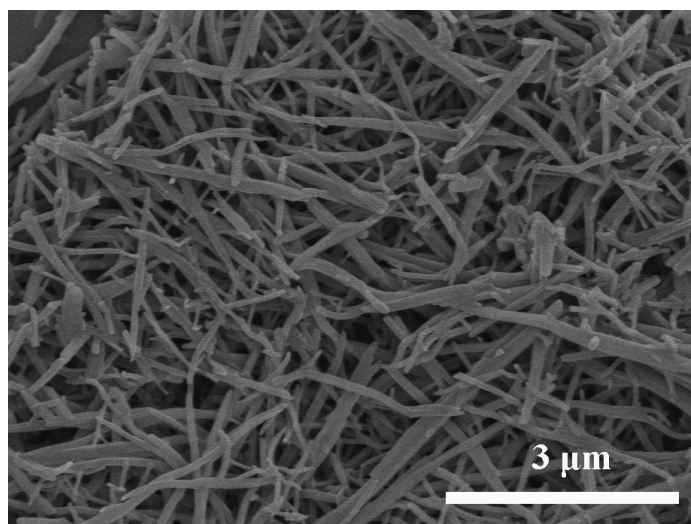

Fig. S11. SEM images of CoTPP after 2 h electrolysis.

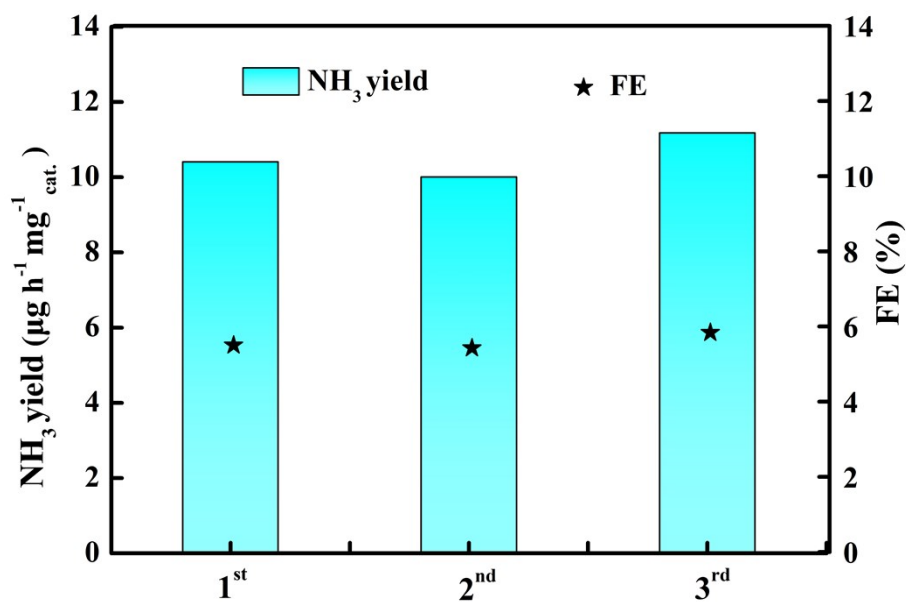

Fig. S12. NH<sub>3</sub> yields and FEs of CuTPP measured for three times at  $-0.3$  V vs. RHE in 0.1 M HCl.



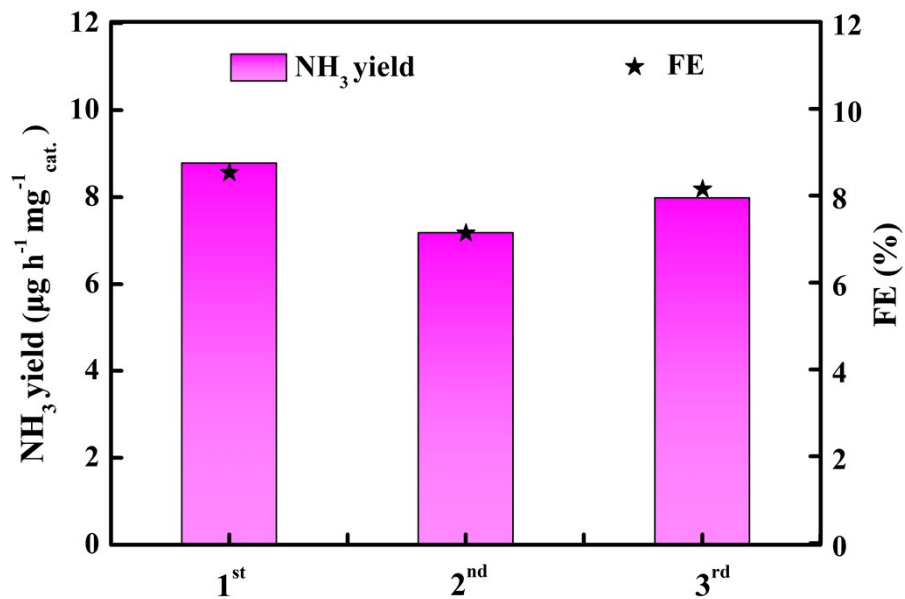

Fig. S13. NH<sub>3</sub> yields and FEs of MnTPP measured for three times at -0.4 V vs. RHE in 0.1 M HCl.

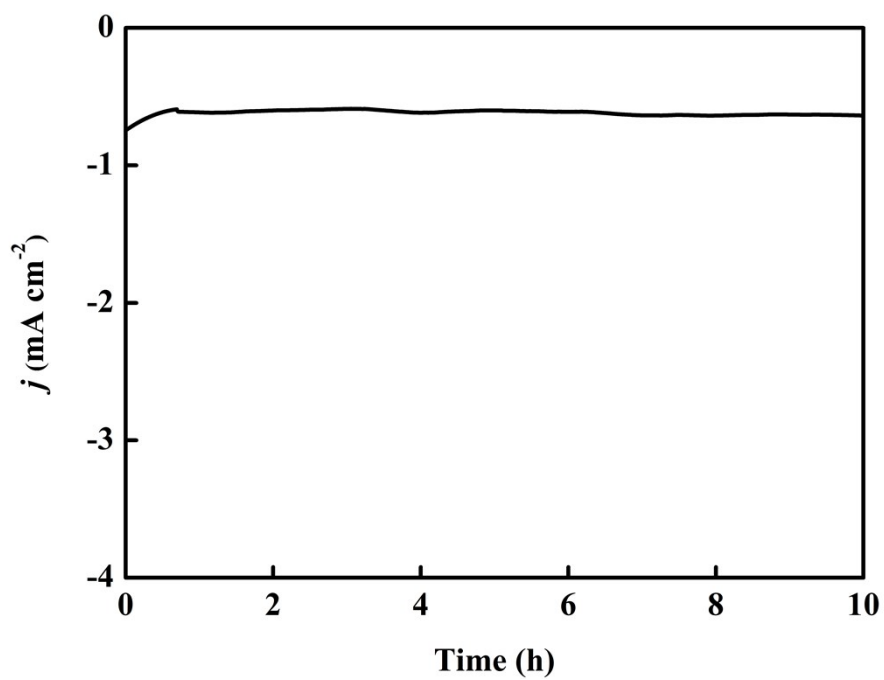

Fig. S14. Time-dependent current density curve of CuTPP for 10 h at the electrolysis of -0.3 V vs. RHE.



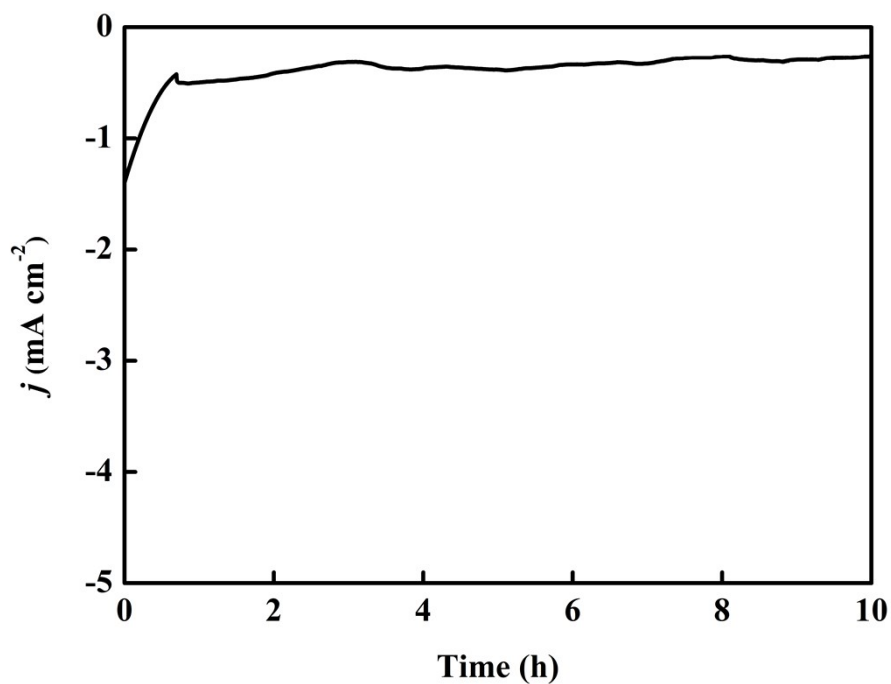

Fig. S15. Time-dependent current density curve of MnTPP for 10 h at the electrolysis of  $-0.4$  V vs. RHE.

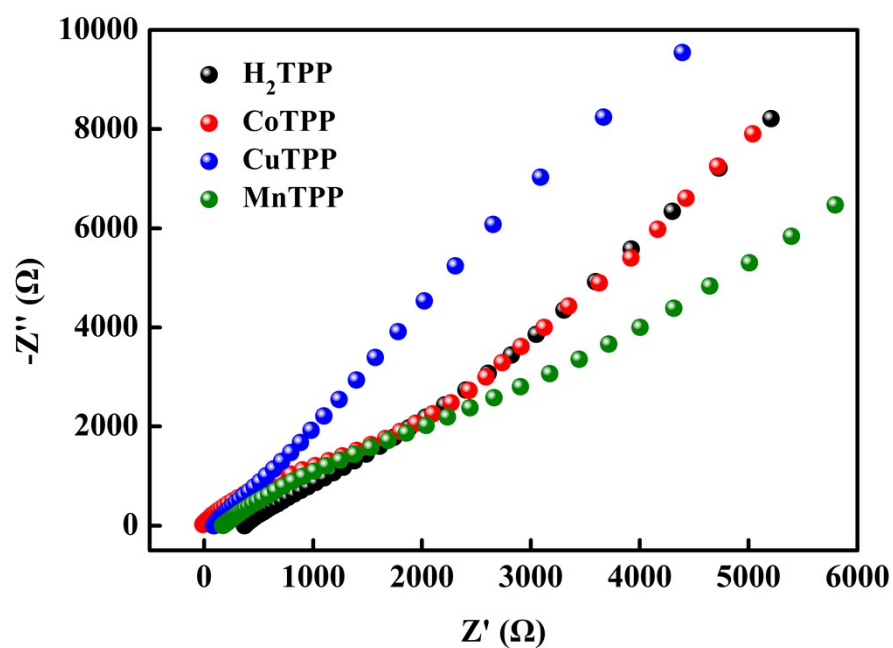

Fig. S16. Nyquist plots of H<sub>2</sub>TPP and MTPP.

Table S1. Comparison of electrocatalytic NRR performance for CoTPP with noble-metal-free electrocatalysts under ambient conditions.

| Catalyst                                 | Electrolyte                              | NH <sub>3</sub> Yield rate<br>( $\mu\text{g h}^{-1} \text{mg}^{-1}_{\text{cat.}}$ ) | FE<br>(%)    | Potential<br>(V) | Reference                                                |
|------------------------------------------|------------------------------------------|-------------------------------------------------------------------------------------|--------------|------------------|----------------------------------------------------------|
| <b>CoTPP</b>                             | <b>0.1 M HCl</b>                         | <b>15.18</b>                                                                        | <b>11.43</b> | <b>-0.3</b>      | <b>This work</b>                                         |
| FePc/C                                   | 0.1 M<br>Na <sub>2</sub> SO <sub>4</sub> | 10.25                                                                               | 10.5         | -0.3             | ACS Catal. 2019, <b>9</b> 7311-7317                      |
| CoP                                      | 1 M KOH                                  | 10.78                                                                               | 7.36         | -0.4             | Small Methods, 2018, <b>2</b> , 1800204                  |
| V <sub>2</sub> O <sub>3</sub> /C         | 0.1 M<br>Na <sub>2</sub> SO <sub>4</sub> | 12.3                                                                                | 7.28         | -0.6             | Inorg. Chem. Front., 2019, <b>6</b> , 391-395            |
| Nb <sub>2</sub> O <sub>5</sub> /CC       | 0.1 M<br>Na <sub>2</sub> SO <sub>4</sub> | 17.63                                                                               | 2.26         | -0.6             | Inorg. Chem. Front., 2019, <b>6</b> , 423-427            |
| CoS <sub>2</sub> /NS-G                   | 0.05 M<br>H <sub>2</sub> SO <sub>4</sub> | 25.0                                                                                | 25.9         | -0.2             | Proc. Natl. Acad. Sci., 2019, <b>116</b> , 6635-6640     |
| MoN                                      | 0.1 M HCl                                | 18.42                                                                               | 1.15         | -0.3             | ACS Sustainable Chem. Eng., 2018, <b>6</b> , 9550-9554   |
| WO <sub>3</sub>                          | 0.1 M HCl                                | 4.2                                                                                 | 12.8         | -0.12            | Nano Energy, 2019, <b>62</b> , 869-875                   |
| $\gamma$ -Fe <sub>2</sub> O <sub>3</sub> | 0.1 M KOH                                | 0.212                                                                               | 1.9          | 0.0              | ACS Sustainable Chem. Eng., 2017, <b>5</b> , 10986-10995 |
| TiO <sub>2</sub>                         | 0.1 M HCl                                | 3.0                                                                                 | 6.5          | -0.12            | Appl. Catal. B: Environ., 2019, <b>257</b> , 117896      |
| Bi nanoplates                            | 0.2 M<br>Na <sub>2</sub> SO <sub>4</sub> | 5.453                                                                               | 11.68        | -0.6             | Angew. Chem. Int. Ed., 2019, <b>58</b> , 9464-9469       |
| Mo <sub>3</sub> Fe <sub>3</sub> C        | 0.1 M Li <sub>2</sub> SO <sub>4</sub>    | 1.23                                                                                | 27           | -0.05            | Nano Energy, 2020, <b>68</b> 104374                      |
| Mo <sub>2</sub> C/C                      | 0.5 M Li <sub>2</sub> SO <sub>4</sub>    | 11.3                                                                                | 7.8          | -0.3             | Adv. Mater., 2018, <b>30</b> , 1803694                   |
| MoO <sub>3</sub><br>nanosheets           | 0.1 M HCl                                | 29.43                                                                               | 1.9          | -0.5             | J. Mater. Chem. A, 2018, <b>6</b> , 12974-12977          |
